# Supplementary material for: Association between Serum Free Fatty Acids and Clinical and Laboratory Parameters in Acute Heart Failure Patients
Source: MDPI journal article supplement (doi:10.3390/biomedicines11123197), 2023-12-01
Supplement: s1 [file s1]

**Table S2.** Serum levels of FFAs in various groups of AHF patients.

|              |                              | FFA (μmol/L)         |                   |                      |                      |                      |                |                 |                |                |                       |
|--------------|------------------------------|----------------------|-------------------|----------------------|----------------------|----------------------|----------------|-----------------|----------------|----------------|-----------------------|
|              |                              | 16:0                 | 16:1              | 18:0                 | 18:1                 | 18:2                 | 18:3           | 20:4            | 20:5           | 22:6           | Sum                   |
| T2D          | No (N=176)                   | 263.0 (195.1, 317.4) | 31.0 (18.1, 47.3) | 124.1 (98.2, 152.3)  | 324.1 (220.8, 419.3) | 144.0 (90.6, 203.6)  | 5.1 (3.5, 7.6) | 7.2 (5.4, 10.6) | 0.4 (0.2, 0.7) | 1.1 (0.8, 1.6) | 916.9 (656.3, 1146.9) |
|              | Yes (N=128)                  | 259.4 (195.9, 304.4) | 20.9 (13.9, 33.3) | 120.1 (97.9, 155.9)  | 289.2 (224.7, 388.2) | 157.5 (108.2, 200.8) | 5.2 (3.4, 7.9) | 7.2 (5.2, 10.7) | 0.2 (0.2, 0.7) | 1.2 (0.9, 1.7) | 885.1 (678.4, 1094.1) |
|              |                              | p=0.766              | <b>p&lt;0.001</b> | p=0.925              | p=0.192              | p=0.310              | p=0.692        | p=0.997         | p=0.621        | p=0.261        | p=0.510               |
| CAD          | No (N=152)                   | 256.5 (190.5, 312.5) | 30.5 (17.2, 44.6) | 120.7 (97.4, 144.9)  | 321.3 (216.6, 404.4) | 147.1 (90.6, 197.4)  | 5.0 (3.4, 7.0) | 7.2 (5.1, 10.5) | 0.3 (0.2, 0.6) | 1.2 (0.8, 1.7) | 893.1 (635.6, 1129.2) |
|              | Yes (N=152)                  | 262.0 (197.0, 309.3) | 23.0 (14.5, 36.0) | 125.8 (99.8, 158.3)  | 289.9 (230.5, 405.6) | 157.3 (107.6, 206.7) | 5.5 (3.7, 8.3) | 7.1 (5.5, 10.7) | 0.3 (0.2, 0.8) | 1.2 (0.8, 1.6) | 900.8 (696.8, 1122.4) |
|              |                              | p=0.586              | <b>p=0.004</b>    | p=0.051              | p=0.989              | p=0.249              | p=0.128        | p=0.510         | p=0.543        | p=0.964        | p=0.635               |
| MetS         | No (N=98)                    | 260.1 (200.7, 310.9) | 27.2 (17.9, 43.6) | 123.8 (94.5, 151.3)  | 299.0 (222.7, 403.6) | 143.0 (93.8, 203.2)  | 5.4 (3.7, 7.6) | 6.9 (5.0, 10.8) | 0.3 (0.2, 0.7) | 1.1 (0.7, 1.5) | 904.0 (656.3, 1129.2) |
|              | Yes (N=208)                  | 260.5 (195.5, 310.6) | 24.6 (14.7, 39.1) | 121.4 (99.0, 155.4)  | 309.6 (221.5, 405.6) | 155.8 (102.9, 206.6) | 5.1 (3.5, 7.7) | 7.3 (5.4, 10.6) | 0.3 (0.2, 0.7) | 1.2 (0.9, 1.7) | 895.7 (678.4, 1119.1) |
|              |                              | p=0.768              | p=0.058           | p=0.817              | p=0.927              | p=0.408              | p=0.701        | p=0.448         | p=0.933        | p=0.044        | p=0.911               |
| AF           | No (N=137)                   | 256.5 (185.0, 309.0) | 24.0 (16.0, 39.8) | 120.2 (95.4, 158.1)  | 297.9 (210.2, 427.8) | 157.5 (95.0, 206.6)  | 5.2 (3.5, 8.3) | 7.7 (5.7, 10.8) | 0.4 (0.2, 0.8) | 1.1 (0.8, 1.7) | 873.4 (636.0, 1153.9) |
|              | Yes (N=167)                  | 260.5 (203.6, 313.6) | 28.3 (15.7, 39.8) | 123.0 (100.4, 148.5) | 306.8 (231.1, 402.0) | 148.0 (102.8, 203.3) | 5.1 (3.5, 7.5) | 6.6 (4.9, 10.1) | 0.3 (0.2, 0.7) | 1.2 (0.8, 1.7) | 913.4 (693.1, 1097.0) |
|              |                              | p=0.869              | p=0.570           | p=0.970              | p=0.946              | p=0.873              | p=0.406        | p=0.043         | p=0.427        | p=0.645        | p=0.979               |
| Sign(s)<br>* | No (N=65)                    | 268.5 (185.8, 322.2) | 22.4 (13.3, 36.1) | 122.9 (91.5, 162.0)  | 285.3 (218.3, 439.6) | 158.0 (113.1, 226.9) | 5.4 (3.6, 8.3) | 7.0 (4.5, 11.1) | 0.2 (0.2, 0.6) | 1.0 (0.7, 1.5) | 918.5 (631.0, 1208.4) |
|              | Yes (N=239)                  | 259.9 (196.9, 306.8) | 26.8 (17.1, 40.2) | 122.8 (99.3, 152.5)  | 306.8 (222.7, 404.5) | 148.2 (96.8, 196.6)  | 5.1 (3.5, 7.7) | 7.3 (5.4, 10.6) | 0.4 (0.2, 0.7) | 1.2 (0.8, 1.7) | 893.6 (683.4, 1113.1) |
|              |                              | p=0.504              | p=0.119           | p=0.862              | p=0.989              | p=0.232              | p=0.822        | p=0.651         | p=0.114        | p=0.135        | p=0.681               |
| AHF<br>type  | New onset<br>AHF (N=23)      | 278.0 (187.2, 330.4) | 23.7 (13.9, 31.6) | 116.3 (98.7, 158.1)  | 316.4 (227.1, 389.6) | 122.7 (87.0, 222.7)  | 4.4 (3.0, 9.2) | 7.2 (4.0, 10.7) | 0.2 (0.2, 0.6) | 1.0 (0.7, 2.0) | 912.1 (625.7, 1195.3) |
|              | AHF following<br>CHF (N=281) | 259.9 (195.9, 309.7) | 26.4 (16.3, 40.3) | 122.9 (97.9, 153.1)  | 302.3 (221.8, 404.7) | 151.8 (101.9, 203.1) | 5.3 (3.6, 7.6) | 7.2 (5.4, 10.6) | 0.3 (0.2, 0.7) | 1.2 (0.8, 1.7) | 895.8 (670.2, 1121.2) |
|              |                              | p=0.806              | p=0.226           | p=0.940              | p=0.814              | p=0.535              | p=0.362        | p=0.497         | p=0.205        | p=0.586        | p=0.897               |

Data are presented as median and interquartile range (q1, q3). Differences in FFA levels between the groups were tested with the Mann-Whitney U test.

P-values < 0.005 are considered significant after a Bonferroni correction for multiple testing and are depicted in bold.

AF, atrial fibrillation; AHF, acute heart failure; CAD, coronary artery disease; CHF, chronic heart failure; FFA, free fatty acid; MetS, metabolic syndrome; T2D, type 2 diabetes mellitus.

\*Any of the following: peripheral edema, enlarged liver, ascites or jugular venous distension.
