# Supplementary material for: Association between Serum Free Fatty Acids and Clinical and Laboratory Parameters in Acute Heart Failure Patients
Source: MDPI journal article supplement (doi:10.3390/biomedicines11123197), 2023-12-01
Supplement: s1 [file s1]

**Table S1.** Chronic medication of AHF patients prior to index AHF hospitalization.

| Drug                       | All patients with FFA data<br>(n=304) |
|----------------------------|---------------------------------------|
| Furosemide                 | 188 (61.8%)                           |
| Chlortalidone              | 22 (7.2%)                             |
| Indapamide                 | 21 (6.9%)                             |
| MRA                        | 66 (21.7%)                            |
| Digoxin                    | 27 (8.9%)                             |
| Nitrate                    | 39 (12.8%)                            |
| Amiodarone                 | 25 (8.2%)                             |
| Beta-blockers              | 181 (59.5%)                           |
| ACEI                       | 160 (52.6%)                           |
| Ang II receptor antagonist | 32 (10.5%)                            |
| Amlodipine                 | 88 (28.9%)                            |
| Statins                    | 116 (38.2%)                           |
| Insulin                    | 49 (16.1%)                            |
| Metformin                  | 51 (16.8%)                            |
| Sulphonylurea              | 33 (10.9%)                            |
| ASA                        | 81 (26.6%)                            |
| Warfarine                  | 82 (27.0%)                            |

Data are presented as N (%).

ACEI, angiotensin-converting-enzyme inhibitor; AHF, acute heart failure; Ang II, angiotensin II; ASA, acetylsalicylic acid; MRA, mineralocorticoid receptor antagonist.
