# Supplementary material for: Association between Serum Free Fatty Acids and Clinical and Laboratory Parameters in Acute Heart Failure Patients
Source: MDPI journal article supplement (doi:10.3390/biomedicines11123197), 2023-12-01
Supplement: s1 [file s1]

**Table S3.** Differences in FFA levels between AHF patients who were alive and those who died during index AHF hospitalization or within 3 or 12 months after index AHF hospitalization.

| Index AHF hospitalization                 |                       |                       |                       |         |
|-------------------------------------------|-----------------------|-----------------------|-----------------------|---------|
| ( $\mu\text{mol/L}$ )                     | Alive (N=271)         | Deceased (N=33)       | Total (N=304)         | p-value |
| FFA 16:0                                  | 261.6 (193.2, 311.0)  | 260.5 (222.5, 304.1)  | 260.5 (195.9, 310.6)  | 0.889   |
| FFA 16:1                                  | 24.8 (15.2, 39.8)     | 27.4 (19.8, 46.7)     | 25.9 (15.9, 39.8)     | 0.440   |
| FFA 18:0                                  | 122.8 (97.8, 154.0)   | 122.8 (98.4, 152.9)   | 122.8 (97.9, 153.9)   | 0.792   |
| FFA 18:1                                  | 302.3 (217.5, 405.6)  | 307.3 (243.2, 371.3)  | 304.6 (221.8, 404.9)  | 0.951   |
| FFA 18:2                                  | 150.3 (101.7, 204.8)  | 151.8 (100.7, 195.4)  | 150.5 (100.8, 203.6)  | 0.874   |
| FFA 18:3                                  | 5.3 (3.5, 7.7)        | 4.6 (3.6, 6.1)        | 5.1 (3.5, 7.7)        | 0.452   |
| FFA 20:4                                  | 7.3 (5.4, 10.7)       | 6.5 (5.1, 8.0)        | 7.2 (5.3, 10.6)       | 0.083   |
| FFA 20:5                                  | 0.4 (0.2, 0.7)        | 0.2 (0.2, 0.4)        | 0.3 (0.2, 0.7)        | 0.067   |
| FFA 22:6                                  | 1.2 (0.8, 1.7)        | 1.3 (0.9, 1.6)        | 1.2 (0.8, 1.7)        | 0.866   |
| Sum                                       | 903.8 (643.6, 1129.4) | 893.0 (757.2, 1112.9) | 896.8 (667.3, 1126.2) | 0.957   |
| 3 months after index AHF hospitalization  |                       |                       |                       |         |
| ( $\mu\text{mol/L}$ )                     | Alive (N=233)         | Deceased (N=71)       | Total (N=304)         | p-value |
| FFA 16:0                                  | 262.0 (188.1, 320.9)  | 252.6 (216.9, 300.2)  | 260.5 (195.9, 310.6)  | 0.844   |
| FFA 16:1                                  | 24.7 (14.5, 39.8)     | 27.2 (19.8, 42.9)     | 25.9 (15.9, 39.8)     | 0.232   |
| FFA 18:0                                  | 123.7 (97.9, 153.8)   | 120.9 (98.1, 154.1)   | 122.8 (97.9, 153.9)   | 0.915   |
| FFA 18:1                                  | 311.9 (210.8, 407.8)  | 296.7 (240.7, 401.2)  | 304.6 (221.8, 404.9)  | 0.760   |
| FFA 18:2                                  | 157.1 (98.8, 210.4)   | 145.9 (102.1, 186.1)  | 150.5 (100.8, 203.6)  | 0.448   |
| FFA 18:3                                  | 5.4 (3.5, 8.1)        | 4.7 (3.6, 6.0)        | 5.1 (3.5, 7.7)        | 0.121   |
| FFA 20:4                                  | 7.3 (5.5, 10.9)       | 6.6 (5.1, 8.5)        | 7.2 (5.3, 10.6)       | 0.069   |
| FFA 20:5                                  | 0.4 (0.2, 0.8)        | 0.2 (0.2, 0.5)        | 0.3 (0.2, 0.7)        | 0.043   |
| FFA 22:6                                  | 1.2 (0.8, 1.7)        | 1.2 (0.9, 1.6)        | 1.2 (0.8, 1.7)        | 0.718   |
| Sum                                       | 912.2 (636.0, 1142.0) | 892.5 (738.1, 1075.7) | 896.8 (667.3, 1126.2) | 0.893   |
| 12 months after index AHF hospitalization |                       |                       |                       |         |
| ( $\mu\text{mol/L}$ )                     | Alive (N=190)         | Deceased (N=114)      | Total (N=304)         | p-value |
| FFA 16:0                                  | 264.7 (199.2, 326.5)  | 246.7 (186.7, 301.3)  | 260.5 (195.9, 310.6)  | 0.169   |
| FFA 16:1                                  | 26.7 (15.7, 40.3)     | 24.7 (16.1, 37.0)     | 25.9 (15.9, 39.8)     | 0.555   |
| FFA 18:0                                  | 123.8 (100.4, 154.1)  | 120.2 (95.4, 152.7)   | 122.8 (97.9, 153.9)   | 0.453   |
| FFA 18:1                                  | 318.3 (216.7, 415.7)  | 288.9 (231.0, 402.2)  | 304.6 (221.8, 404.9)  | 0.629   |
| FFA 18:2                                  | 154.5 (103.5, 215.3)  | 147.0 (100.1, 190.3)  | 150.5 (100.8, 203.6)  | 0.264   |
| FFA 18:3                                  | 5.6 (3.6, 8.5)        | 4.7 (3.5, 6.1)        | 5.1 (3.5, 7.7)        | 0.018   |
| FFA 20:4                                  | 7.6 (5.5, 11.2)       | 6.6 (5.1, 8.7)        | 7.2 (5.3, 10.6)       | 0.015   |
| FFA 20:5                                  | 0.4 (0.2, 0.8)        | 0.2 (0.2, 0.6)        | 0.3 (0.2, 0.7)        | 0.027   |
| FFA 22:6                                  | 1.2 (0.8, 1.8)        | 1.2 (0.8, 1.6)        | 1.2 (0.8, 1.7)        | 0.380   |
| Sum                                       | 921.9 (647.5, 1149.0) | 868.0 (685.4, 1085.5) | 896.8 (667.3, 1126.2) | 0.279   |

Data are presented as median and interquartile range (q1, q3). Differences in FFA levels between the groups were tested with the Mann-Whitney U test.

P-values < 0.005 are considered significant after a Bonferroni correction for multiple testing.

FFA, free fatty acid.
