# Supplementary material for: Association between Serum Free Fatty Acids and Clinical and Laboratory Parameters in Acute Heart Failure Patients
Source: Biomedicines. 2023 Dec 1;11(12):3197. doi: 10.3390/biomedicines11123197 (PMC10740773; doi:10.3390/biomedicines11123197)
Supplement: Supplementary file 1 [file biomedicines-11-03197-s001.zip]

Archive with 4 entries (4 files):
- Scheme. S1.pdf
- Table S1.pdf
- Table S2.pdf
- Table S3.pdf
