# Supplementary figures and images for: Association between Serum Free Fatty Acids and Clinical and Laboratory Parameters in Acute Heart Failure Patients
Source: MDPI journal article supplement (doi:10.3390/biomedicines11123197), 2023-12-01

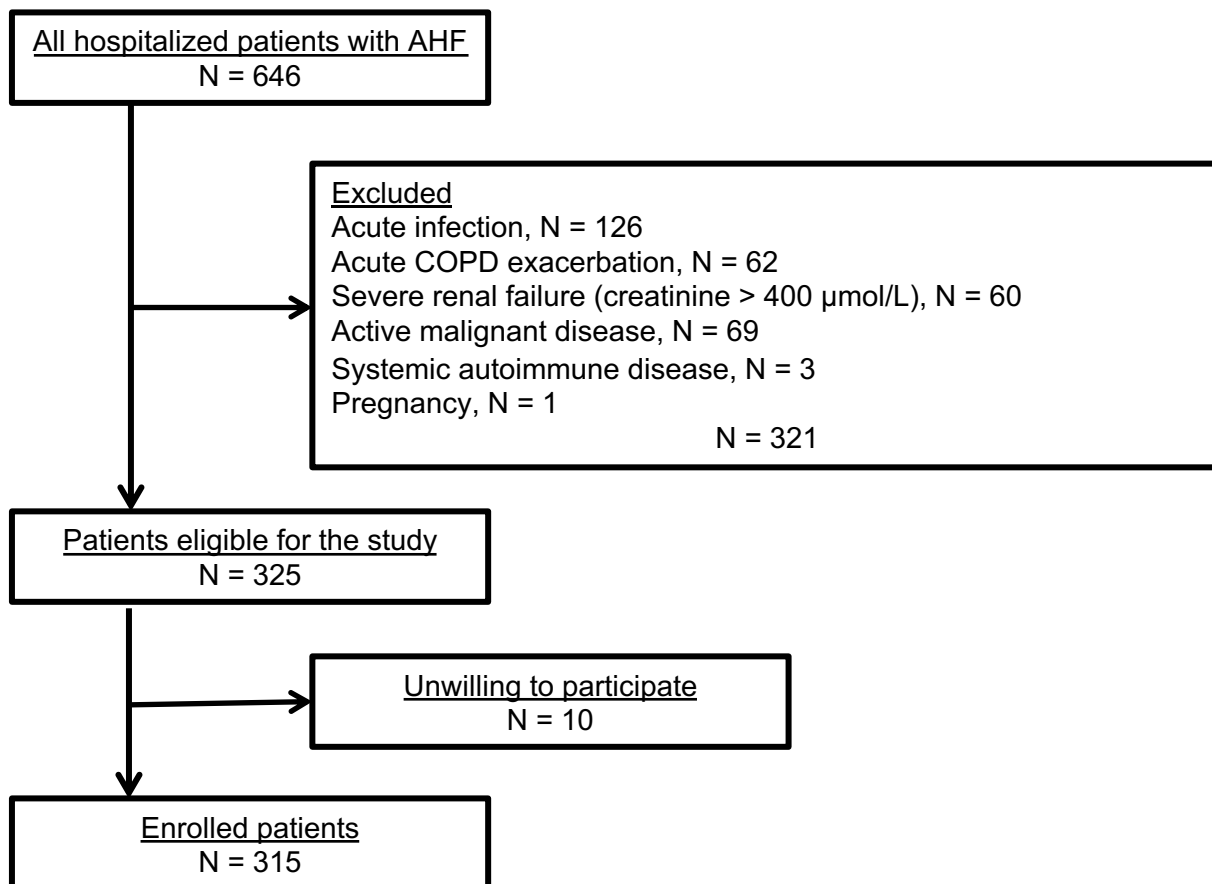

Supplement: s1 [file s1]
